# Supplementary material for: Self-forming electrode modification in organic field-effect transistors
Source: Royal Society of Chemistry journal article supplement (doi:10.1039/c6tc02028c), 2016-01-01
Supplement: c6tc02028c1.pdf [file c6tc02028c1.pdf]

## Electronic Supplementary Information

### Self-forming Electrode Modification in Organic Field-Effect Transistors

**Sangmoo Choi,<sup>a</sup> Felipe A. Larrain,<sup>a</sup> Cheng-Yin Wang,<sup>a</sup> Canek Fuentes-Hernandez,<sup>a</sup>  
Wen-Fang Chou,<sup>a</sup> and Bernard Kippelen<sup>\*a</sup>**

*<sup>a</sup> Center for Organic Photonics and Electronics (COPE) and School of Electrical and Computer Engineering, Georgia Institute of Technology, Atlanta, Georgia 30332.*

*E-mail: kippelen@ece.gatech.edu*

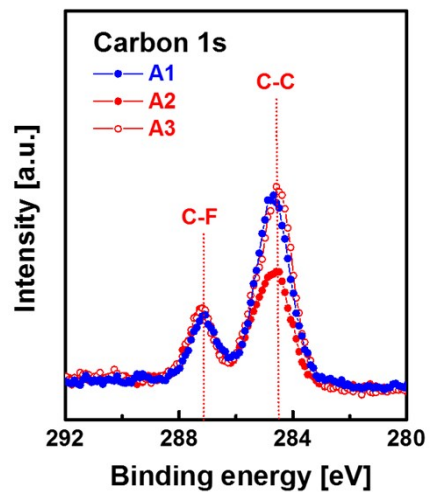

Figure S1. High-resolution XPS spectra on the surface of the sample A1, A2, and A3.

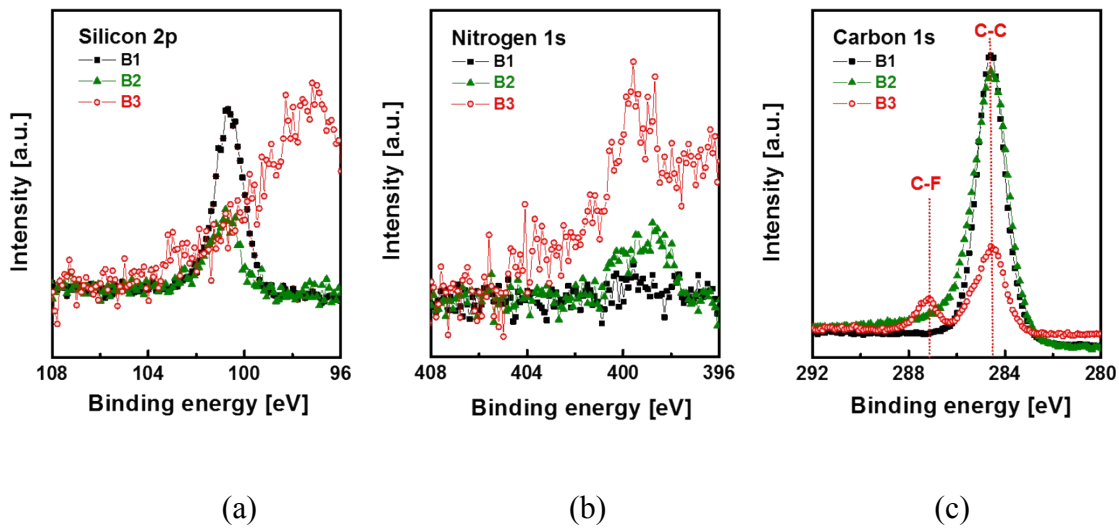

Figure S2. High-resolution XPS spectra of (a) silicon 2p, (b) nitrogen 1s, and (c) carbon 1s on the surface of the three locations, B1, B2, and B3.

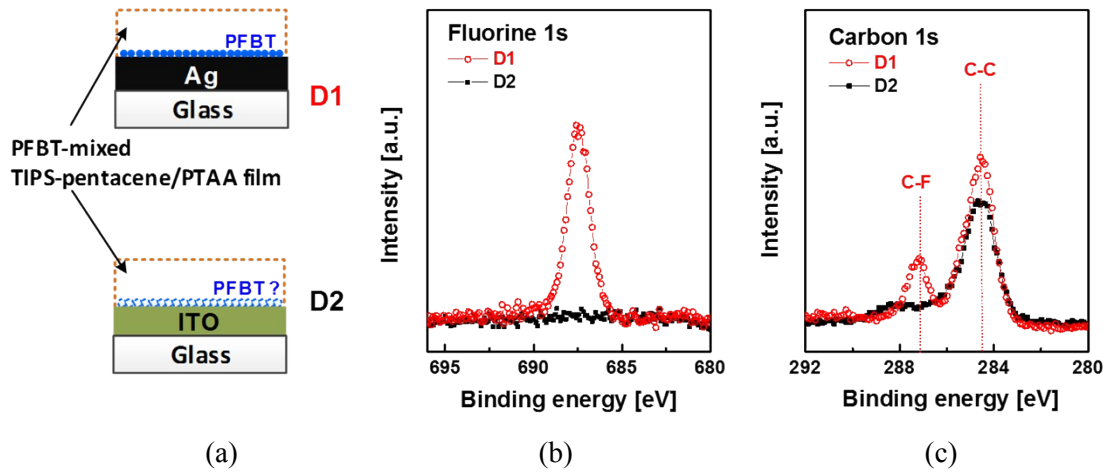

Figure S3. (a) Cross-sectional view of sample D1 and D2: PFBT-mixed TIPS-pentacene/PTAA film was deposited and then removed on evaporated silver (D1) and ITO-coated glass slide (D2) substrates. The high-resolution XPS spectra of (b) fluorine 1s and (c) carbon 1s on the surface of D1 and D2.

Table I

| Process condition                                 | Type C2         | Type C3         |
|---------------------------------------------------|-----------------|-----------------|
| Field-effect mobility [ $\text{cm}^2/\text{Vs}$ ] | $0.74 \pm 0.06$ | $0.70 \pm 0.23$ |
| Threshold voltage [V]                             | $-2.0 \pm 0.20$ | $-2.3 \pm 0.39$ |

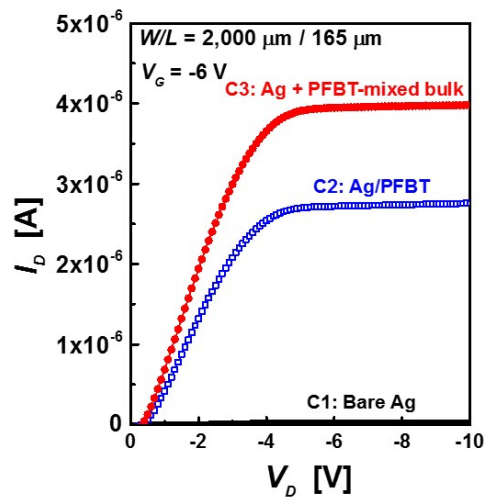

**Figure S4. Comparison of  $I$ - $V$  output characteristics of top-gate TIPS-pentacene/PTAA OFETs at  $V_G = -6$  V.**

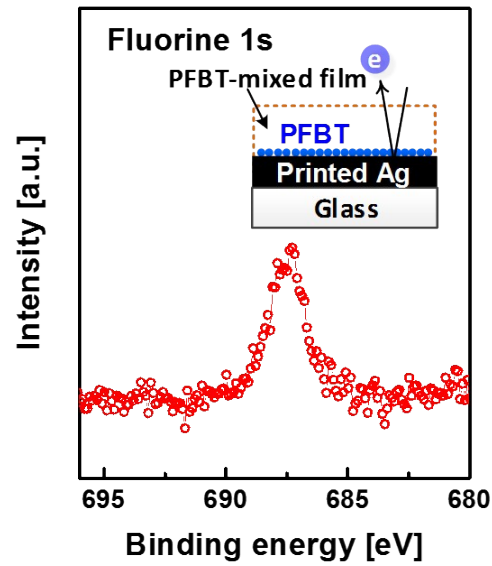

Figure S5. The high-resolution XPS spectrum of fluorine 1s on the surface of a printed silver electrode after depositing and removing a PFBT-mixed TIPS-pentacene/PTAA film.

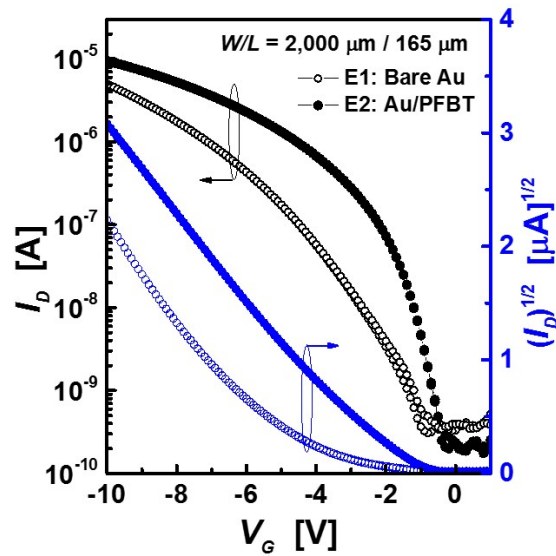

Figure S6. Comparison of transfer characteristics of the top-gate OFETs having PFBT-treated gold electrodes (Au/PFBT), type E2, and bare gold electrodes, type E1.
